# Supplementary material
Source: publisher figshare collection journal article supplement (https://sage.figshare.com/ndownloader/files/13024028)
Supplement: Supplementary file 1 [file 13024028]

|  | |  | |
| --- | --- | --- | --- |
| **Supplemental Table 4-1.** Histopathological scores for animals administered allyl alcohol for 5 or 14 days | | | | | | | | | | | | | | | |
| **Study** | **Animal Number** | | **Day** | | **Dose (mg/kg)** | **Fibrosis--Masson's Trichrome** | **Inflam-mation** | **Necrosis, Single Cell** | **Infiltrate, lympho-plasmacytic, portal** | **infiltrate, PMN** | **Hepato-cellular-lacy vac (glycogen)** | **Biliary Hyperplasia** | **Fibroplasia** | **Clear Cell Focus of Cellular Alteration** | **Portal Bridging** |
| Definitive | 15B | | 5 | | 0 | 0 | 0 | 0 | 0 | 0 | 1 | 0 | 0 | 0 | 0 |
| Definitive | 15N | | 5 | | 0 | 0 | 1 | 0 | 1 | 1 | 1 | 0 | 0 | 0 | 0 |
| Definitive | 15T | | 5 | | 0 | 0 | 0 | 0 | 0 | 0 | 1 | 0 | 0 | 0 | 0 |
| Definitive | 16N | | 5 | | 0 | 1 | 1 | 0 | 1 | 0 | 1 | 0 | 0 | 0 | 0 |
| Definitive | 16T | | 5 | | 0 | 0 | 0 | 0 | 0 | 0 | 1 | 0 | 0 | 0 | 0 |
| Definitive | 19B | | 5 | | 4.5 | 0 | 0 | 0 | 0 | 0 | 2 | 0 | 0 | 0 | 0 |
| Definitive | 19N | | 5 | | 4.5 | 0 | 0 | 0 | 0 | 0 | 1 | 0 | 0 | 0 | 0 |
| Definitive | 19T | | 5 | | 4.5 | 0 | 0 | 0 | 0 | 0 | 1 | 0 | 0 | 0 | 0 |
| Definitive | 20N | | 5 | | 4.5 | 0 | 0 | 0 | 0 | 0 | 1 | 0 | 0 | 0 | 0 |
| Definitive | 20T | | 5 | | 4.5 | 0 | 0 | 0 | 0 | 0 | 1 | 0 | 0 | 1 | 0 |
| Definitive | 13B | | 5 | | 9.7 | 0 | 0 | 0 | 0 | 0 | 2 | 1 | 0 | 0 | 0 |
| Definitive | 13N | | 5 | | 9.7 | 0 | 1 | 0 | 1 | 0 | 1 | 0 | 0 | 0 | 0 |
| Definitive | 13T | | 5 | | 9.7 | 0 | 1 | 1 | 1 | 1 | 1 | 0 | 0 | 0 | 0 |
| Definitive | 14N | | 5 | | 9.7 | 1 | 0 | 0 | 0 | 0 | 2 | 0 | 0 | 0 | 0 |
| Definitive | 14T | | 5 | | 9.7 | 0 | 1 | 0 | 1 | 0 | 1 | 0 | 0 | 0 | 0 |
| Definitive | 17B | | 5 | | 20.9 | 0 | 0 | 0 | 0 | 0 | 3 | 1 | 0 | 0 | 0 |
| Definitive | 17N | | 5 | | 20.9 | 0 | 0 | 0 | 0 | 0 | 1 | 0 | 0 | 0 | 0 |
| Definitive | 17T | | 5 | | 20.9 | 0 | 0 | 0 | 0 | 0 | 1 | 0 | 0 | 0 | 0 |
| Definitive | 18N | | 5 | | 20.9 | 0 | 0 | 0 | 0 | 0 | 2 | 0 | 0 | 0 | 0 |
| Definitive | 18T | | 5 | | 20.9 | 0 | 1 | 0 | 1 | 0 | 0 | 0 | 0 | 0 | 0 |
| Definitive | 37B | | 14 | | 0 | 0 | 0 | 0 | 0 | 0 | 1 | 0 | 0 | 0 | 0 |
| Definitive | 37N | | 14 | | 0 | 0 | 0 | 0 | 0 | 0 | 1 | 0 | 0 | 0 | 0 |
| Definitive | 37T | | 14 | | 0 | not evaluated | 0 | 0 | 0 | 0 | 1 | 0 | 0 | 0 | 0 |
| Definitive | 38N | | 14 | | 0 | 0 | 0 | 0 | 0 | 0 | 0 | 0 | 0 | 0 | 0 |
| Definitive | 38T | | 14 | | 0 | 0 | 0 | 0 | 0 | 0 | 1 | 0 | 0 | 0 | 0 |
| Definitive | 41B | | 14 | | 4.5 | 0 | 0 | 0 | 0 | 0 | 0 | 0 | 0 | 0 | 0 |
| Definitive | 41N | | 14 | | 4.5 | 0 | 0 | 0 | 0 | 0 | 0 | 0 | 0 | 0 | 0 |
| Definitive | 41T | | 14 | | 4.5 | 0 | 0 | 0 | 0 | 0 | 1 | 0 | 0 | 0 | 0 |
| Definitive | 42N | | 14 | | 4.5 | 1 | 1 | 0 | 1 | 0 | 1 | 1 | 0 | 0 | 0 |
| Definitive | 42T | | 14 | | 4.5 | 1 | 1 | 0 | 1 | 1 | 2 | 0 | 0 | 0 | 0 |
| Definitive | 43B | | 14 | | 9.7 | 0 | 1 | 0 | 1 | 1 | 1 | 0 | 0 | 0 | 0 |
| Definitive | 43N | | 14 | | 9.7 | 0 | 1 | 0 | 1 | 1 | 1 | 0 | 0 | 0 | 0 |
| Definitive | 43T | | 14 | | 9.7 | 1 | 1 | 0 | 1 | 1 | 1 | 0 | 0 | 0 | 0 |
| Definitive | 44N | | 14 | | 9.7 | 0 | 1 | 0 | 1 | 0 | 1 | 0 | 0 | 0 | 1 |
| Definitive | 44Ta | | 14 | | 9.7 | not evaluated | not evaluated | not evaluated | not evaluated | not evaluated | not evaluated | not evaluated | not evaluated | not evaluated | not evaluated |
| Definitive | 39B | | 14 | | 20.9 | 0 | 0 | 0 | 0 | 0 | 1 | 0 | 0 | 0 | 0 |
| Definitive | 39N | | 14 | | 20.9 | 0 | 1 | 0 | 1 | 0 | 1 | 0 | 0 | 0 | 0 |
| Definitive | 39T | | 14 | | 20.9 | 2 | 1 | 0 | 1 | 0 | 1 | 0 | 0 | 0 | 0 |
| Definitive | 40N | | 14 | | 20.9 | 1 | 1 | 0 | 1 | 0 | 0 | 0 | 0 | 0 | 0 |
| Definitive | 40T | | 14 | | 20.9 | 1 | 1 | 1 | 1 | 0 | 1 | 0 | 1 | 0 | 1 |

a

| **Supplemental Table 4-2.** Histopathological scores for animals administered carbon tetrachloride for 5, 14, or 28 days | | | | | | | | | | | | | | | | | | | | | |  | |
| --- | --- | --- | --- | --- | --- | --- | --- | --- | --- | --- | --- | --- | --- | --- | --- | --- | --- | --- | --- | --- | --- | --- | --- |
| **Study** | **Animal Number** | **Day** | **Dose (mg/kg)** | **Masson's Trichrome** | **Inflam-mation** | **Necrosis, Single Cell** | **Vacuolation, hepato (lipid-like)** | **Infiltrate, lympho-plasmacytic, portal** | **infiltrate, PMN** | **Collag Accum** | **Infiltrate, lympho, random** | **Hepato-cellular-lacy vac (glycogen)** | **Cystic De-generation** | **Lakes of plasma** | **Biliary Hyperplasia** | **Fibroplasia** | **Increased Hepatic Mitotic Figures** | **Ectatic Lymphatics, Portal** | **Clear Cell Focus of Cellular Alteration** | **Paren-chymal Loss, Fibropl-asia** | **Infiltrate, lympho, centri-lobular** | |
| Definitive | 21B | 5 | 0 | 0 | 1 | 0 | 0 | 0 | 1 |  | 0 | 1 | 0 | 0 | 0 | 0 | 0 | 0 | 0 | 0 | 0 | |
| Definitive | 21N | 5 | 0 | 0 | 0 | 0 | 0 | 0 | 0 |  | 0 | 1 | 0 | 0 | 0 | 0 | 0 | 0 | 0 | 0 | 0 | |
| Definitive | 21T | 5 | 0 | 0 | 0 | 0 | 0 | 0 | 0 |  | 0 | 1 | 0 | 0 | 0 | 0 | 0 | 0 | 0 | 0 | 0 | |
| Definitive | 22N | 5 | 0 | 0 | 0 | 0 | 0 | 0 | 0 |  | 0 | 1 | 0 | 0 | 0 | 0 | 0 | 0 | 0 | 0 | 0 | |
| Definitive | 22T | 5 | 0 | 0 | 1 | 0 | 0 | 1 | 1 |  | 0 | 2 | 0 | 0 | 0 | 0 | 0 | 0 | 0 | 0 | 0 | |
| Definitive | 25B | 5 | 20 | 0 | 0 | 0 | 2 | 0 | 0 |  | 0 | 2 | 0 | 0 | 0 | 0 | 0 | 0 | 0 | 0 | 0 | |
| Definitive | 25N | 5 | 20 | 0 | 0 | 0 | 1 | 0 | 0 |  | 0 | 2 | 0 | 0 | 0 | 0 | 0 | 0 | 0 | 0 | 0 | |
| Definitive | 25T | 5 | 20 | 0 | 0 | 0 | 2 | 0 | 0 |  | 0 | 2 | 0 | 0 | 0 | 0 | 0 | 0 | 0 | 0 | 0 | |
| Definitive | 26N | 5 | 20 | 0 | 0 | 0 | 2 | 0 | 0 |  | 0 | 1 | 0 | 0 | 0 | 0 | 0 | 0 | 0 | 0 | 0 | |
| Definitive | 26T | 5 | 20 | 1 | 1 | 0 | 2 | 1 | 0 |  | 0 | 1 | 0 | 0 | 0 | 0 | 0 | 0 | 0 | 0 | 0 | |
| Definitive | 27B | 5 | 92.8 | 0 | 0 | 0 | 3 | 0 | 0 |  | 0 | 3 | 0 | 0 | 0 | 0 | 0 | 0 | 0 | 0 | 0 | |
| Definitive | 27N | 5 | 92.8 | 0 | 0 | 0 | 3 | 0 | 0 |  | 0 | 3 | 0 | 0 | 0 | 0 | 0 | 0 | 0 | 0 | 0 | |
| Definitive | 27T | 5 | 92.8 | 0 | 0 | 0 | 2 | 0 | 0 |  | 0 | 0 | 0 | 0 | 0 | 0 | 1 | 0 | 0 | 0 | 0 | |
| Definitive | 28N | 5 | 92.8 | 0 | 1 | 0 | 3 | 0 | 1 |  | 0 | 1 | 1 | 0 | 0 | 0 | 0 | 0 | 0 | 0 | 1 | |
| Definitive | 28T | 5 | 92.8 | 0 | 0 | 0 | 2 | 0 | 0 |  | 0 | 0 | 0 | 0 | 0 | 0 | 0 | 0 | 0 | 0 | 0 | |
| Definitive | 23B | 5 | 200.0 | 0 | 0 | 0 | 3 | 0 | 0 |  | 0 | 0 | 2 | 0 | 0 | 0 | 2 | 0 | 0 | 0 | 0 | |
| Definitive | 23N | 5 | 200.0 | 0 | 0 | 0 | 3 | 0 | 0 |  | 0 | 0 | 0 | 0 | 0 | 0 | 2 | 0 | 0 | 0 | 0 | |
| Definitive | 23T | 5 | 200.0 | 0 | 0 | 1 | 3 | 0 | 0 |  | 0 | 0 | 3 | 0 | 2 | 0 | 2 | 0 | 0 | 0 | 0 | |
| Definitive | 24N | 5 | 200.0 | 0 | 0 | 0 | 3 | 0 | 0 |  | 0 | 0 | 1 | 0 | 0 | 0 | 1 | 0 | 0 | 0 | 0 | |
| Definitive | 24T | 5 | 200.0 | 0 | 0 | 1 | 3 | 0 | 0 |  | 0 | 0 | 3 | 0 | 0 | 0 | 2 | 0 | 0 | 0 | 0 | |
| Definitive | 45B | 14 | 0 | 0 | 1 | 0 | 0 | 1 | 0 | 0 | 0 | 0 | 0 | 0 | 1 | 1 | 0 | 0 | 0 | 0 | 0 | |
| Definitive | 45N | 14 | 0 | 0 | 0 | 0 | 0 | 0 | 0 | 0 | 0 | 0 | 0 | 0 | 0 | 0 | 0 | 0 | 0 | 0 | 0 | |
| Definitive | 45T | 14 | 0 | 0 | 0 | 0 | 0 | 0 | 0 | 0 | 0 | 0 | 0 | 0 | 0 | 0 | 0 | 0 | 0 | 0 | 0 | |
| Definitive | 46N | 14 | 0 | 0 | 1 | 0 | 0 | 1 | 0 | 0 | 0 | 1 | 0 | 0 | 0 | 0 | 0 | 0 | 0 | 0 | 0 | |
| Definitive | 46T | 14 | 0 | 0 | 0 | 0 | 0 | 0 | 0 | 0 | 0 | 1 | 0 | 0 | 0 | 0 | 0 | 0 | 0 | 0 | 0 | |
| Definitive | 49B | 14 | 20 | 0 | 0 | 0 | 3 | 0 | 0 | 0 | 0 | 0 | 0 | 0 | 0 | 0 | 0 | 0 | 0 | 0 | 0 | |
| Definitive | 49N | 14 | 20 | 0 | 1 | 0 | 2 | 1 | 0 | 0 | 1 | 0 | 0 | 0 | 0 | 0 | 0 | 0 | 0 | 0 | 0 | |
| Definitive | 49T | 14 | 20 | 0 | 1 | 0 | 3 | 1 | 0 | 0 | 0 | 0 | 0 | 0 | 0 | 0 | 1 | 0 | 0 | 0 | 0 | |
| Definitive | 50N | 14 | 20 | 1 | 0 | 0 | 2 | 0 | 0 | 0 | 0 | 0 | 0 | 0 | 1 | 0 | 0 | 0 | 0 | 0 | 0 | |
| Definitive | 50T | 14 | 20 | 1 | 0 | 0 | 2 | 0 | 0 | 0 | 0 | 0 | 0 | 0 | 0 | 0 | 0 | 0 | 0 | 0 | 0 | |
| Definitive | 51B | 14 | 92.8 | 1 | 1 | 1 | 2 | 1 | 0 | 0 | 0 | 0 | 2 | 0 | 0 | 0 | 1 | 0 | 0 | 0 | 1 | |
| Definitive | 51N | 14 | 92.8 | 0 | 1 | 0 | 3 | 1 | 0 | 0 | 0 | 0 | 2 | 0 | 0 | 0 | 0 | 0 | 0 | 0 | 1 | |
| Definitive | 51T | 14 | 92.8 | 0 | 0 | 0 | 3 | 0 | 0 | 0 | 1 | 0 | 1 | 0 | 0 | 0 | 0 | 0 | 0 | 0 | 0 | |
| Definitive | 52N | 14 | 92.8 | 1 | 0 | 0 | 3 | 0 | 0 | 0 | 0 | 0 | 2 | 0 | 2 | 0 | 0 | 0 | 0 | 0 | 0 | |
| Definitive | 52T | 14 | 92.8 | 0 | 1 | 0 | 3 | 1 | 0 | 0 | 1 | 0 | 3 | 1 | 0 | 0 | 1 | 0 | 0 | 1 | 1 | |
| Definitive | 47B | 14 | 200.0 | 2 | 1 | 2 | 3 | 1 | 0 | 0 | 0 | 0 | 3 | 0 | 0 | 2 | 1 | 0 | 0 | 1 | 1 | |
| Definitive | 47N | 14 | 200.0 | 1 | 1 | 1 | 3 | 0 | 1 | 0 | 0 | 0 | 3 | 0 | 0 | 1 | 1 | 0 | 0 | 1 | 0 | |
| Definitive | 47T | 14 | 200.0 | 1 | 1 | 1 | 2 | 1 | 0 | 0 | 0 | 0 | 2 | 0 | 0 | 0 | 2 | 0 | 0 | 0 | 0 | |
| Definitive | 48N | 14 | 200.0 | 1 | 1 | 2 | 2 | 1 | 0 | 0 | 1 | 0 | 3 | 0 | 0 | 0 | 1 | 0 | 0 | 1 | 1 | |
| Definitive | 48T | 14 | 200.0 | 2 | 0 | 1 | 2 | 0 | 0 | 0 | 0 | 0 | 3 | 0 | 1 | 1 | 1 | 0 | 0 | 1 | 0 | |
| Definitive | 29B | 28 | 0 | 0 | 1 | 0 | 0 | 1 | 0 | 0 | 0 | 1 | 0 | 0 | 0 | 0 | 0 | 0 | 0 | 0 | 0 | |
| Definitive | 29N | 28 | 0 | 0 | 0 | 0 | 0 | 0 | 0 | 0 | 0 | 0 | 0 | 0 | 0 | 0 | 0 | 0 | 0 | 0 | 0 | |
| Definitive | 29T | 28 | 0 | 0 | 0 | 0 | 0 | 0 | 0 | 0 | 0 | 0 | 0 | 0 | 0 | 0 | 0 | 0 | 0 | 0 | 0 | |
| Definitive | 30N | 28 | 0 | 0 | 0 | 0 | 0 | 0 | 0 | 0 | 0 | 0 | 0 | 0 | 0 | 0 | 0 | 0 | 0 | 0 | 0 | |
| Definitive | 30T | 28 | 0 | 0 | 0 | 0 | 0 | 0 | 0 | 0 | 0 | 1 | 0 | 0 | 0 | 0 | 0 | 0 | 1 | 0 | 0 | |
| Definitive | 33B | 28 | 20 | 0 | 1 | 0 | 3 | 1 | 0 | 0 | 0 | 0 | 0 | 0 | 0 | 0 | 0 | 0 | 0 | 0 | 0 | |
| Definitive | 33N | 28 | 20 | 0 | 0 | 0 | 3 | 0 | 0 | 0 | 0 | 0 | 0 | 0 | 0 | 0 | 0 | 0 | 0 | 0 | 0 | |
| Definitive | 33T | 28 | 20 | 1 | 1 | 0 | 2 | 1 | 0 | 0 | 0 | 1 | 0 | 0 | 0 | 0 | 0 | 0 | 0 | 0 | 1 | |
| Definitive | 34N | 28 | 20 | 0 | 1 | 0 | 1 | 1 | 0 | 0 | 0 | 1 | 0 | 0 | 0 | 0 | 0 | 0 | 0 | 0 | 0 | |
| Definitive | 34T | 28 | 20 | 1 | 0 | 0 | 3 | 0 | 0 | 0 | 0 | 0 | 1 | 0 | 0 | 0 | 0 | 0 | 0 | 0 | 0 | |
| Definitive | 35B | 28 | 92.8 | 0 | 0 | 1 | 3 | 0 | 0 | 0 | 0 | 2 | 3 | 0 | 0 | 0 | 0 | 0 | 0 | 0 | 0 | |
| Definitive | 35N | 28 | 92.8 | 1 | 1 | 2 | 2 | 0 | 0 | 0 | 0 | 1 | 3 | 0 | 0 | 1 | 0 | 0 | 0 | 0 | 1 | |
| Definitive | 35T | 28 | 92.8 | not evaluated | not evaluated | not evaluated | not evaluated | not evaluated | not evaluated | not evaluated | not evaluated | not evaluated | not evaluated | not evaluated | not evaluated | not evaluated | not evaluated | not evaluated | not evaluated | not evaluated | not evaluated | |
| Definitive | 36N | 28 | 92.8 | 0 | 0 | 0 | 3 | 0 | 0 | 0 | 0 | 1 | 2 | 0 | 0 | 1 | 0 | 0 | 0 | 0 | 0 | |
| Definitive | 36T | 28 | 92.8 | 1 | 0 | 1 | 3 | 0 | 0 | 0 | 0 | 1 | 3 | 0 | 0 | 2 | 1 | 0 | 0 | 1 | 0 | |
| Definitive | 31B | 28 | 200.0 | 3 | 1 | 1 | 3 | 0 | 0 | 0 | 0 | 0 | 4 | 0 | 0 | 1 | 0 | 2 | 0 | 2 | 1 | |
| Definitive | 31N | 28 | 200.0 | 3 | 1 | 1 | 2 | 1 | 0 | 0 | 0 | 0 | 4 | 0 | 0 | 1 | 2 | 2 | 0 | 1 | 1 | |
| Definitive | 31T | 28 | 200.0 | 3 | 1 | 1 | 3 | 1 | 0 | 0 | 0 | 0 | 4 | 0 | 0 | 1 | 3 | 2 | 0 | 1 | 1 | |
| Definitive | 32N | 28 | 200.0 | 4 | 2 | 1 | 3 | 2 | 0 | 0 | 0 | 0 | 4 | 0 | 0 | 2 | 3 | 2 | 0 | 1 | 1 | |
| Definitive | 32T | 28 | 200.0 | 4 | 2 | 2 | 2 | 1 | 1 | 0 | 0 | 0 | 4 | 0 | 2 | 3 | 2 | 1 | 0 | 1 | 2 | |
